# Supplementary material for: Upregulation of Thioredoxin Reductase 1 Expression by Flavan-3-Ols Protects Human Kidney Proximal Tubular Cells from Hypoxia-Induced Cell Death
Source: MDPI journal article supplement (doi:10.3390/antiox11071399), 2022-07-19
Supplement: s1 [file s1]

Suppl material: Figure S1

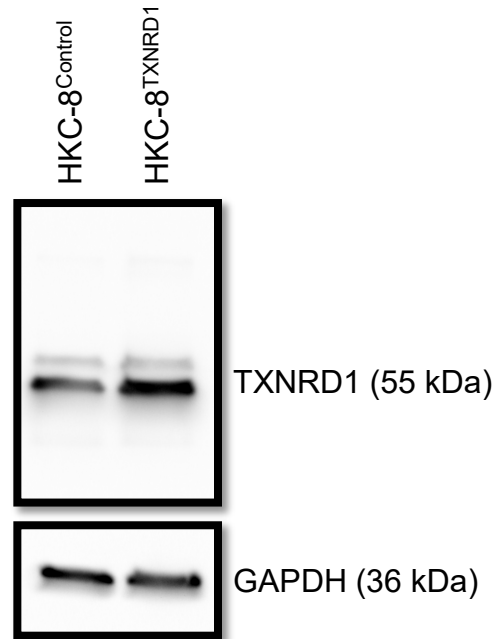

**Figure S1.** The protein levels of TXNRD1 in both HKC-8<sup>TXNRD1</sup> and HKC-8<sup>Control</sup> cells. Protein samples were prepared from cells that were grown in K1<sup>+/+</sup> medium in a CO<sub>2</sub> incubator at 37 °C. The levels of TXNRD1 protein were semi-quantitatively determined using Western blot analysis. Data are a representative of three separate experiments

Suppl material: Figure S2

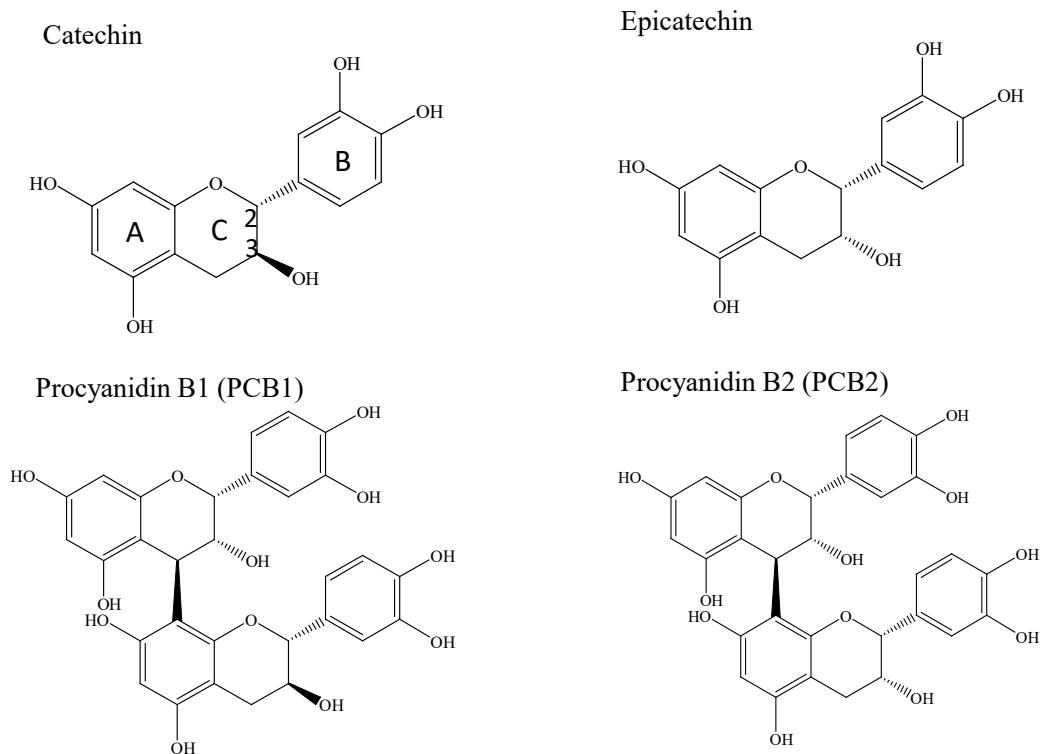

**Figure S2.** The chemical structures of catechin, epicatechin, PCB1, and PCB2. The common structure consists of A- and B-benzene rings and a dihydropyran heterocycle C-ring with a hydroxyl group on carbon 3. Two chiral centers on the structure on carbon 2 and 3. Stereoisomers are found in *trans* [(+)-catechin] or *cis* [(-)-epicatechin] configuration on carbon 2 and 3.

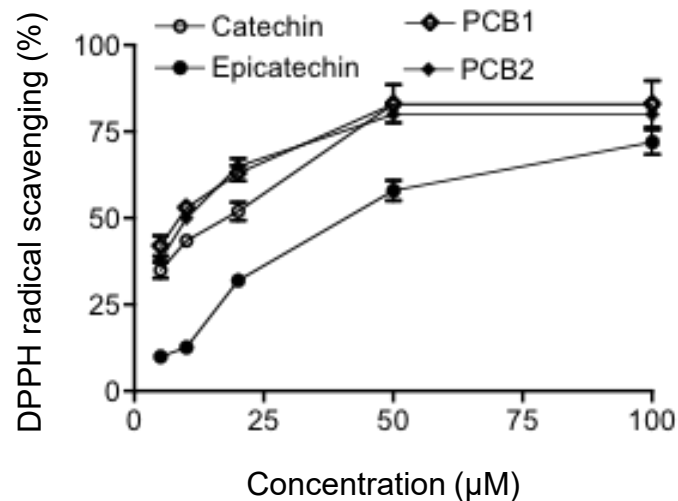

**Figure S3.** The DPPH (2,2-diphenyl-1-picrylhydrazyl) radical scavenging activities of catechin, epicatechin, PCB1, and PCB2. The optical density of 510 nm – the reaction of DPPH with different concentrations of flavon-3-ols was determined as described in our previous study (Reference 13). The positive control: 100 µM of L-Ascorbic acid that inhibited  $78.5 \pm 5\%$  of DPPH. Data are presented as mean  $\pm$  SD of three determinants.

## Suppl material: Figure S4

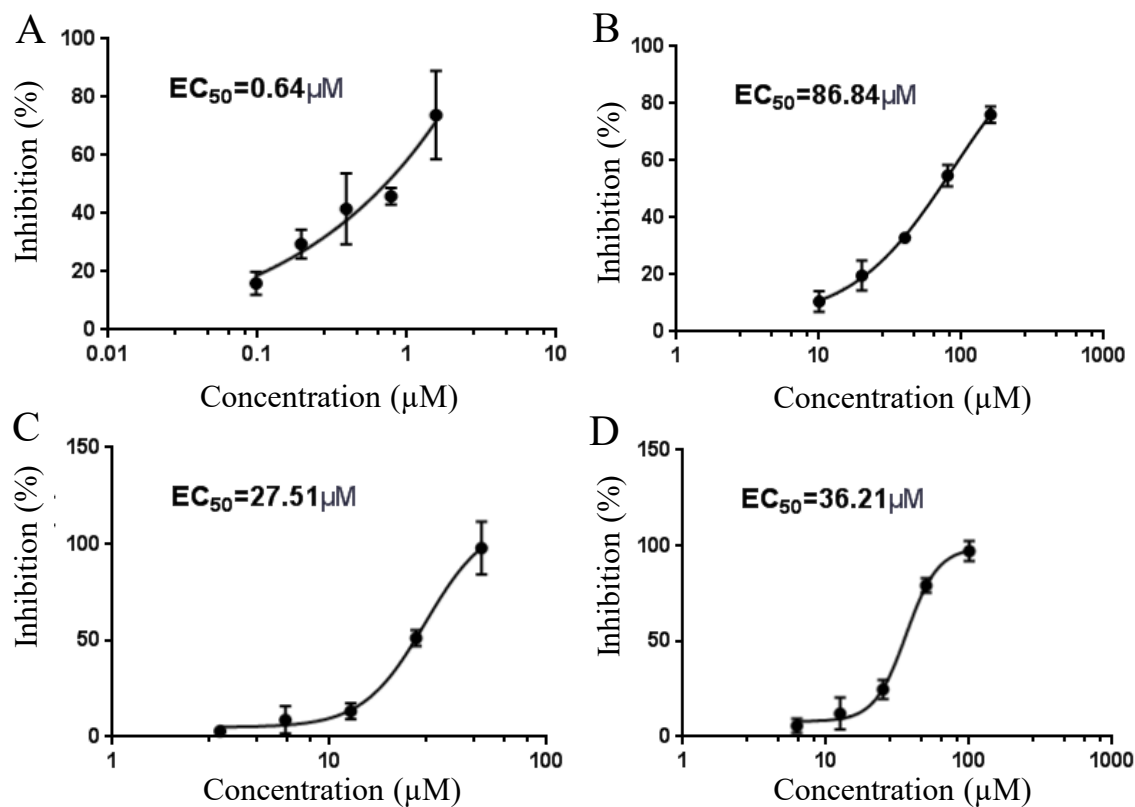

**Figure S4.** Different effects of flavan-3-ols on H<sub>2</sub>O<sub>2</sub>-induced cell death in HKC-8 cells. HKC-8 cells in 96-well plates were treated with 0.5 μM H<sub>2</sub>O<sub>2</sub> in the absence or presence of flavan-3-ols at different concentrations for 48 h. Cell viability was measured using MTT assay. Percentage inhibition of cell death (reduced optical density – OD) by flavan-3-ols was determined using the formula  $(T - F)/T \times 100$ , where  $T$  was cell death by H<sub>2</sub>O<sub>2</sub> without treatment, and  $F$  was the cell death in cultures treated with flavan-3-ols, respectively. The EC<sub>50</sub> value of each flavan-3-ol was calculated based on the inhibition curve. A) Catechin, B) Epicatechin, C) PCB1, D) PCB2. Data are presented as mean  $\pm$  standard deviation of 4 determinants and are a representative of three separate experiments

Table S1. A gene list for PCR array analysis of oxidative stress in HKC-8 cells

| Number | UniGene   | Genbank          | Symbol | Description                                                    |
|--------|-----------|------------------|--------|----------------------------------------------------------------|
| 1      | Hs.418167 | NM_000477        | ALB    | Albumin                                                        |
| 2      | Hs.654431 | NM_000697        | ALOX12 | Arachidonate 12-lipoxygenase                                   |
| 3      | Hs.406238 | NM_001159        | AOX1   | Aldehyde oxidase 1                                             |
| 4      | Hs.654439 | NM_000041        | APOE   | Apolipoprotein E                                               |
| 5      | Hs.125213 | NM_004045        | ATOX1  | ATX1 antioxidant protein 1 homolog (yeast)                     |
| 6      | Hs.144873 | NM_004052        | BNIP3  | BCL2/adenovirus E1B 19kDa interacting protein 3                |
| 7      | Hs.502302 | NM_001752        | CAT    | Catalase                                                       |
| 8      | Hs.514821 | NM_002985        | CCL5   | Chemokine (C-C motif) ligand 5                                 |
| 9      | Hs.502917 | NM_005125<br>CCS | CCS    | Copper chaperone for superoxide dismutase                      |
| 10     | Hs.292356 | NM_000397        | CYBB   | Cytochrome b-245, beta polypeptide                             |
| 11     | Hs.95120  | NM_134268        | CYGB   | Cytoglobin                                                     |
| 12     | Hs.498727 | NM_014762        | DHCR24 | 24-dehydrocholesterol reductase                                |
| 13     | Hs.272813 | NM_175940        | DUOX1  | Dual oxidase 1                                                 |
| 14     | Hs.71377  | NM_014080        | DUOX2  | Dual oxidase 2                                                 |
| 15     | Hs.171695 | NM_004417        | DUSP1  | Dual specificity phosphatase 1                                 |
| 16     | Hs.212088 | NM_001979        | EPHX2  | Epoxide hydrolase 2, cytoplasmic                               |
| 17     | Hs.279259 | NM_000502        | EPX    | Eosinophil peroxidase                                          |
| 18     | Hs.239    | NM_021953        | FOXO1  | Forkhead box M1                                                |
| 19     | Hs.645560 | NM_002032        | FTH1   | Ferritin, heavy polypeptide 1                                  |
| 20     | Hs.654465 | NM_001498        | GCLC   | Glutamate-cysteine ligase, catalytic subunit                   |
| 21     | Hs.315562 | NM_002061        | GCLM   | Glutamate-cysteine ligase, modifier subunit                    |
| 22     | Hs.76686  | NM_000581        | GPX1   | Glutathione peroxidase 1                                       |
| 23     | Hs.2704   | NM_002083        | GPX2   | Glutathione peroxidase 2 (gastrointestinal)                    |
| 24     | Hs.386793 | NM_002084        | GPX3   | Glutathione peroxidase 3 (plasma)                              |
| 25     | Hs.433951 | NM_002085        | GPX4   | Glutathione peroxidase 4 (phospholipid hydroperoxidase)        |
| 26     | Hs.248129 | NM_001509        | GPX5   | Glutathione peroxidase 5 (epididymal androgen-related protein) |
| 27     | Hs.448570 | NM_182701        | GPX6   | Glutathione peroxidase 6 (olfactory)                           |
| 28     | Hs.43728  | NM_015696        | GPX7   | Glutathione peroxidase 7                                       |
| 29     | Hs.271510 | NM_000637        | GSR    | Glutathione reductase                                          |
| 30     | Hs.82327  | NM_000178        | GSS    | Glutathione synthetase                                         |
| 31     | Hs.523836 | NM_000852        | GSTP1  | Glutathione S-transferase pi 1                                 |
| 32     | Hs.655292 | NM_001513        | GSTZ1  | Glutathione transferase zeta 1                                 |
| 33     | Hs.520459 | NM_001518        | GTF2I  | General transcription factor Iii                               |
| 34     | Hs.517581 | NM_002133        | HMOX1  | Heme oxygenase (decycling) 1                                   |
| 35     | Hs.728810 | NM_005345        | HSPA1A | Heat shock 70kDa protein 1A                                    |
| 36     | Hs.80828  | NM_006121        | KRT1   | Keratin 1                                                      |
| 37     | Hs.234742 | NM_006151        | LPO    | Lactoperoxidase                                                |

|    |           |           |        |                                                                                       |
|----|-----------|-----------|--------|---------------------------------------------------------------------------------------|
| 38 | Hs.517586 | NM_005368 | MB     | Myoglobin                                                                             |
| 39 | Hs.499674 | NM_000242 | MBL2   | Mannose-binding lectin (protein C) 2, soluble                                         |
| 40 | Hs.191734 | NM_004528 | MGST3  | Microsomal glutathione S-transferase 3                                                |
| 41 | Hs.458272 | NM_000250 | MPO    | Myeloperoxidase                                                                       |
| 42 | Hs.75659  | NM_002437 | MPV17  | MpV17 mitochondrial inner membrane protein                                            |
| 43 | Hs.490981 | NM_012331 | MSRA   | Methionine sulfoxide reductase A                                                      |
| 44 | Hs.73133  | NM_005954 | MT3    | Metallothionein 3                                                                     |
| 45 | Hs.647047 | NM_000265 | NCF1   | Neutrophil cytosolic factor 1                                                         |
| 46 | Hs.587558 | NM_000433 | NCF2   | Neutrophil cytosolic factor 2                                                         |
| 47 | Hs.709191 | NM_000625 | NOS2   | Nitric oxide synthase 2, inducible                                                    |
| 48 | Hs.371036 | NM_016931 | NOX4   | NADPH oxidase 4                                                                       |
| 49 | Hs.657932 | NM_024505 | NOX5   | NADPH oxidase, EF-hand calcium binding domain 5                                       |
| 50 | Hs.406515 | NM_000903 | NQO1   | NAD(P)H dehydrogenase, quinone 1                                                      |
| 51 | Hs.534331 | NM_002452 | NUDT1  | Nudix (nucleoside diphosphate linked moiety X)-type motif 1                           |
| 52 | Hs.148778 | NM_181354 | OXR1   | Oxidation resistance 1                                                                |
| 53 | Hs.475970 | NM_005109 | OXSRI  | Oxidative-stress responsive 1                                                         |
| 54 | Hs.368525 | NM_020992 | PDLIM1 | PDZ and LIM domain 1                                                                  |
| 55 | Hs.78016  | NM_007254 | PNKP   | Polynucleotide kinase 3'-phosphatase                                                  |
| 56 | Hs.180909 | NM_002574 | PRDX1  | Peroxiredoxin 1                                                                       |
| 57 | Hs.432121 | NM_005809 | PRDX2  | Peroxiredoxin 2                                                                       |
| 58 | Hs.523302 | NM_006793 | PRDX3  | Peroxiredoxin 3                                                                       |
| 59 | Hs.83383  | NM_006406 | PRDX4  | Peroxiredoxin 4                                                                       |
| 60 | Hs.502823 | NM_181652 | PRDX5  | Peroxiredoxin 5                                                                       |
| 61 | Hs.120    | NM_004905 | PRDX6  | Peroxiredoxin 6                                                                       |
| 62 | Hs.153310 | NM_020820 | PREX1  | Phosphatidylinositol-3,4,5-trisphosphate-dependent Rac exchange factor 1              |
| 63 | Hs.472010 | NM_183079 | PRNP   | Prion protein                                                                         |
| 64 | Hs.201978 | NM_000962 | PTGS1  | Prostaglandin-endoperoxide synthase 1 (prostaglandin G/H synthase and cyclooxygenase) |
| 65 | Hs.196384 | NM_000963 | PTGS2  | Prostaglandin-endoperoxide synthase 2 (prostaglandin G/H synthase and cyclooxygenase) |
| 66 | Hs.332197 | NM_012293 | PXDN   | Peroxidasin homolog (Drosophila)                                                      |
| 67 | Hs.134623 | NM_014245 | RNF7   | Ring finger protein 7                                                                 |
| 68 | Hs.128856 | NM_182826 | SCARA3 | Scavenger receptor class A, member 3                                                  |
| 69 | Hs.32148  | NM_203472 | SELS   | Selenoprotein S                                                                       |
| 70 | Hs.275775 | NM_005410 | SEPP1  | Selenoprotein P, plasma, 1                                                            |
| 71 | Hs.253495 | NM_003019 | SFTPD  | Surfactant protein D                                                                  |
| 72 | Hs.466693 | NM_012237 | SIRT2  | Sirtuin 2                                                                             |
| 73 | Hs.443914 | NM_000454 | SOD1   | Superoxide dismutase 1, soluble                                                       |

|    |           |           |        |                                                      |
|----|-----------|-----------|--------|------------------------------------------------------|
| 74 | Hs.487046 | NM_000636 | SOD2   | Superoxide dismutase 2, mitochondrial                |
| 75 | Hs.2420   | NM_003102 | SOD3   | Superoxide dismutase 3, extracellular                |
| 76 | Hs.437277 | NM_003900 | SQSTM1 | Sequestosome 1                                       |
| 77 | Hs.516830 | NM_080725 | SRXN1  | Sulfiredoxin 1                                       |
| 78 | Hs.516807 | NM_006374 | STK25  | Serine/threonine kinase 25                           |
| 79 | Hs.467554 | NM_000547 | TPO    | Thyroid peroxidase                                   |
| 80 | Hs.134602 | NM_003319 | TTN    | Titin                                                |
| 81 | Hs.435136 | NM_003329 | TXN    | Thioredoxin                                          |
| 82 | Hs.728817 | NM_003330 | TXNRD1 | Thioredoxin reductase 1                              |
| 83 | Hs.443430 | NM_006440 | TXNRD2 | Thioredoxin reductase 2                              |
| 84 | Hs.80658  | NM_003355 | UCP2   | Uncoupling protein 2 (mitochondrial, proton carrier) |
| 85 | Hs.520640 | NM_001101 | ACTB   | Actin, beta                                          |
| 86 | Hs.534255 | NM_004048 | B2M    | Beta-2-microglobulin                                 |
| 87 | Hs.592355 | NM_002046 | GAPDH  | Glyceraldehyde-3-phosphate dehydrogenase             |
| 88 | Hs.412707 | NM_000194 | HPRT1  | Hypoxanthine phosphoribosyltransferase 1             |
| 89 | Hs.546285 | NM_001002 | RPLP0  | Ribosomal protein, large, P0                         |

Genes from 1 to 84 are oxidative stress-related, and from 85 to 89 are housekeeping controls

Table S2 SBSAnalysis of HIF-1a binding site of affected oxidative stress-related gene using gene transcription regulation database (gtrg.biouml.org)

| Gene     | Effects of hypoxia | Effects of catechin in hypoxia | HIF1a binding site count |
|----------|--------------------|--------------------------------|--------------------------|
| ALOX12   | Upregulated        |                                | 10                       |
| BNIP3    | Upregulated        |                                | 9                        |
| CYBB     | Upregulated        | Downregulated                  | 0                        |
| CYGB     | Upregulated        |                                | 16                       |
| DUOX2    | Upregulated        |                                | 7                        |
| DUSP1    | Upregulated        | Downregulated                  | 10                       |
| GPX2     | Upregulated        |                                | 2                        |
| MBL2     | Upregulated        |                                | 11                       |
| NCF2     | Upregulated        | Downregulated                  | 5                        |
| NOX4     | Upregulated        |                                | 7                        |
| PTGS1    | Upregulated        |                                | 11                       |
| PTGS2    | Upregulated        | Upregulated                    | 4                        |
| SEPP1    | Upregulated        |                                | Not found                |
| SPINK1   | Upregulated        |                                | 4                        |
| TTN      | Upregulated        |                                | 34                       |
| DHCR22   | Downregulated      |                                | Not found                |
| GCLC     | Downregulated      | Upregulated                    | 38                       |
| HPRT1    | Downregulated      |                                | 6                        |
| HSPA1A   | Downregulated      | Upregulated                    | 16                       |
| NOX5     | Downregulated      | Upregulated                    | 26                       |
| NUDT1    | Downregulated      |                                | 6                        |
| PRNP     | Downregulated      |                                | 11                       |
| SRXN1    | Downregulated      | Downregulated                  | 7                        |
| BAG2     | Downregulated      |                                | 9                        |
| GCLM     | Downregulated      |                                | 7                        |
| GLA      | Downregulated      |                                | 6                        |
| HSP90AA1 | Downregulated      |                                | 15                       |
| SLC7A11  | Downregulated      |                                | 15                       |
| TXNRD1   | Downregulated      | Upregulated                    | 43                       |
| CCL5     |                    | Upregulated                    | 0                        |
| NCF1     |                    | Upregulated                    | 1                        |
| PRDX3    |                    | Upregulated                    | 5                        |
| PRDX4    |                    | Upregulated                    | 5                        |
| SOD3     |                    | Downregulated                  | 2                        |

Date set: meta clusters, Max gene distance: 5000
